# Supplementary material
Source: PubMed Central journal article supplement (PMC5590230)
Supplement: NIHMS899054-supplement-Supplementary_Materials_1.pdf [file NIHMS899054-supplement-Supplementary_Materials_1.pdf]

## Supplementary Materials for

### **Astrocyte-shed extracellular vesicles regulate the peripheral leukocyte response to inflammatory brain lesions**

Alex M. Dickens, Luis B. Tovar-y-Romo, Seung-Wan Yoo, Amanda L. Trout, Mihyun Bae, Marlene Kanmogne, Bezawit Megra, Dionna W. Williams, Kenneth W. Witwer, Mar Gacias, Nino Tabatadze, Robert N. Cole, Patrizia Casaccia, Joan W. Berman, Daniel C. Anthony, Norman J. Haughey\*

\*Corresponding author. Email: nhaughe1@jhmi.edu

Published 4 April 2017, *Sci. Signal.* **10**, eaai7696 (2017)  
DOI: 10.1126/scisignal.aai7696

#### **The PDF file includes:**

Fig. S1. Additional leukocyte, ceramide, and sphingomyelin measurements.  
Fig. S2. Additional cytokine measurements and plasma EV counts after intrastriatal injection of IL-1 $\beta$ .  
Fig. S3. EV isolation, quantitation, and liver cytokine response 24 hours after EV infusion in mice.  
Fig. S4. IL-1 $\beta$  and TNF $\alpha$  promote formation of ceramide-rich membrane microdomains and EV release from astrocytes.  
Fig. S5. EVs rapidly transverse endothelial cells in a BBB model system.  
Fig. S6. Additional proteomic and ChIP results.  
Legends for tables S1 and S2  
Table S3. List of miRNA identified in exosomes and relative fold change.  
Table S4. List of ChIP primers.  
Legend for movie S1

**Other Supplementary Material for this manuscript includes the following:**  
(available at [www.sciencesignaling.org/cgi/content/full/10/473/eaai7696/DC1](http://www.sciencesignaling.org/cgi/content/full/10/473/eaai7696/DC1))

Table S1 (Microsoft Excel format). List of all proteins identified in exosomes collected from control GFAP-GFP astrocytes.

Table S2 (Microsoft Excel format). List of all proteins identified in exosomes collected from IL-1 $\beta$ -stimulated GFAP-GFP astrocytes.  
Movie S1 (.mov format). Visualization of IL-1 $\beta$ -induced release of EVs from cultured primary astrocytes.

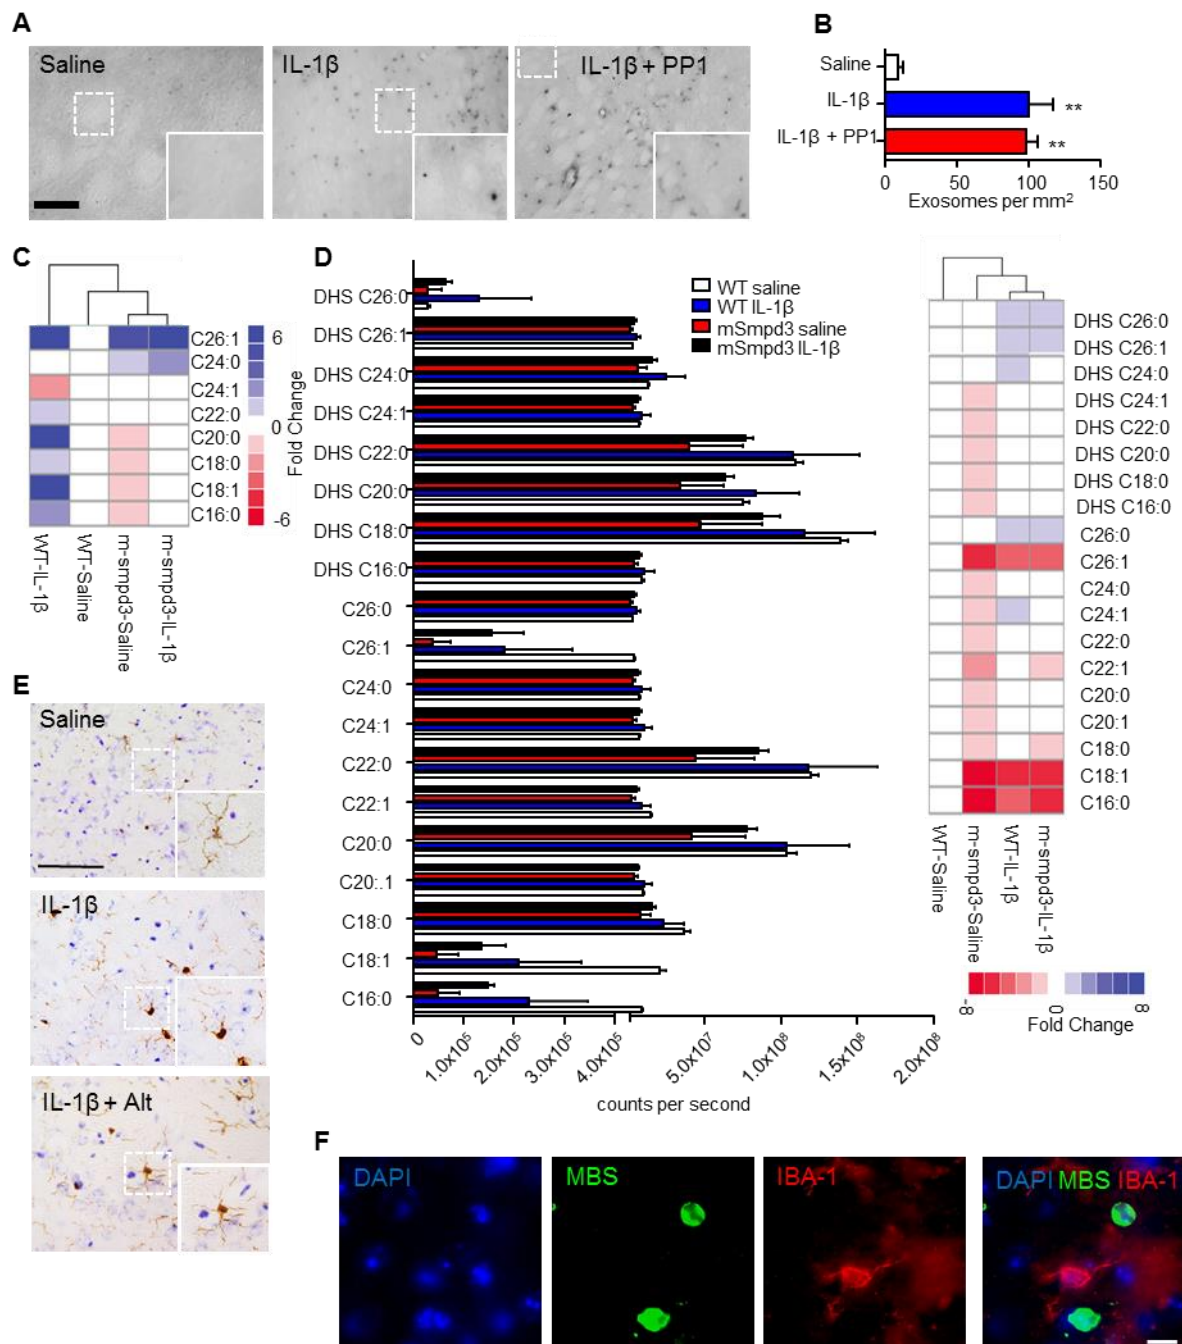

**Fig. S1. Additional leukocyte, ceramide, and sphingomyelin measurements.** (A) Representative photomicrographs of Ly6b<sup>+</sup> leukocytes in striatum 24 hours after injection of saline, IL-1 $\beta$  (0.1 ng in 3  $\mu$ l), or IL-1 $\beta$  + PP1 (0.176 ng in 3  $\mu$ l). Insets are magnifications of the indicated regions. Scale bar = 250  $\mu$ m. (B) Stereological quantitations for the indicated treatments. (C) Hierarchical clustering analysis of ceramide species (identified by acyl chain length and saturation) in striatum 2 hours after the indicated treatments. (D) Quantitative mass spectrometry and hierarchical clustering of dihydrosphingomyelin and sphingomyelin species (identified by acyl chain length and saturation) 2 hours after the indicated treatments. (E) Representative photomicrographs of Iba-1<sup>+</sup> microglia in striatum in Wt mice. Insets show a ramified quiescent microglia in Saline injected, amoeboid activated microglia in IL-1 $\beta$ , and ramified microglia in IL-1 $\beta$  + Altenusin. (F) Immunofluorescent staining of striatum in Wt mice 24 hours following injection of IL-1 $\beta$  showing that MBS<sup>+</sup> leukocytes do not overlap with Iba-1<sup>+</sup> microglia. Nuclei are identified with DAPI. Data are mean  $\pm$  SEM, n = 3-6 mice per condition. \*\*  $p < 0.01$  compared to control.

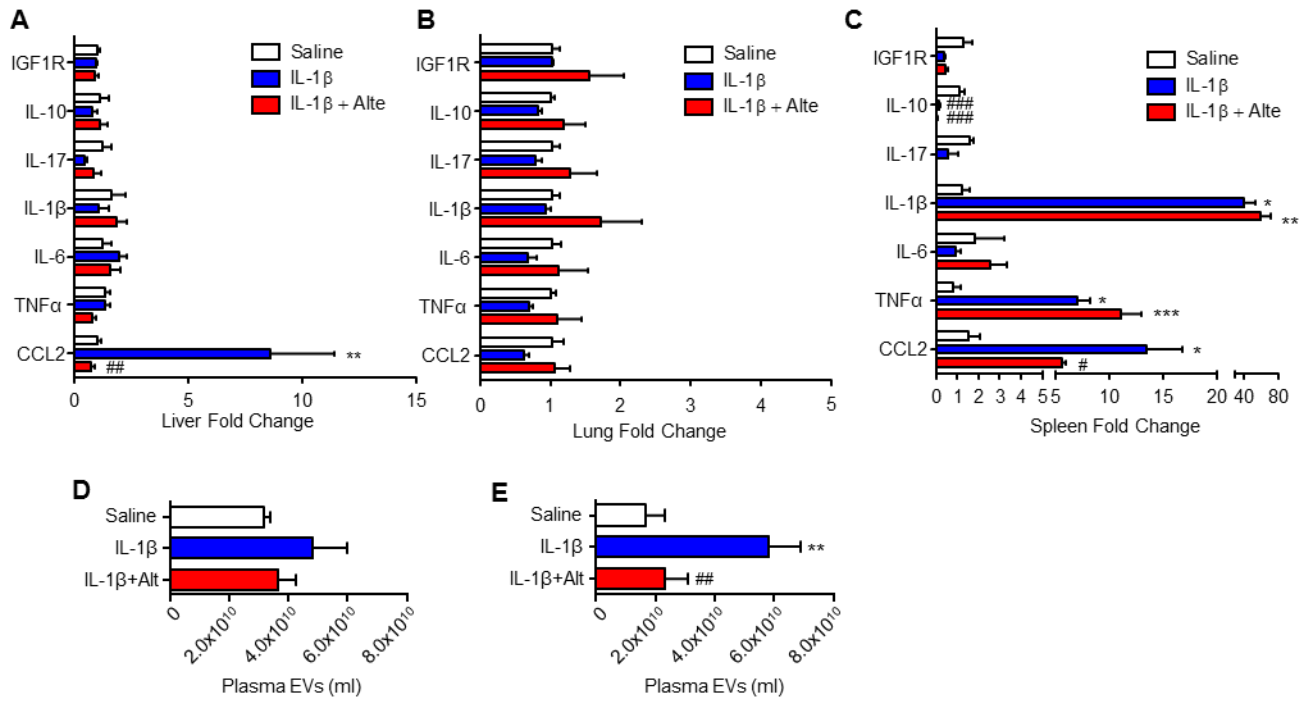

**Fig. S2. Additional cytokine measurements and plasma EV counts after intrastriatal injection of IL-1β.** Cytokine expression in (A) liver (B) lung, and (C) spleen measured 24 hours following intra-striatal injections of saline, IL-1β (0.1 ng in 3 μl), or IL-1β + altenusin (50 μM). EVs were quantified in plasma of mice (D) 2 hours, and (E) 24 hours following intra-striatal injections of saline, IL-1β, or IL-1β + altenusin. Data are mean ± SEM, n = 3-6 mice per condition. \*  $p < 0.05$ , \*\*  $p < 0.01$ , \*\*\*  $p < 0.001$  compared to control, and #  $p < 0.05$ , ##  $p < 0.01$ , ###  $p < 0.001$  compared to IL-1β.

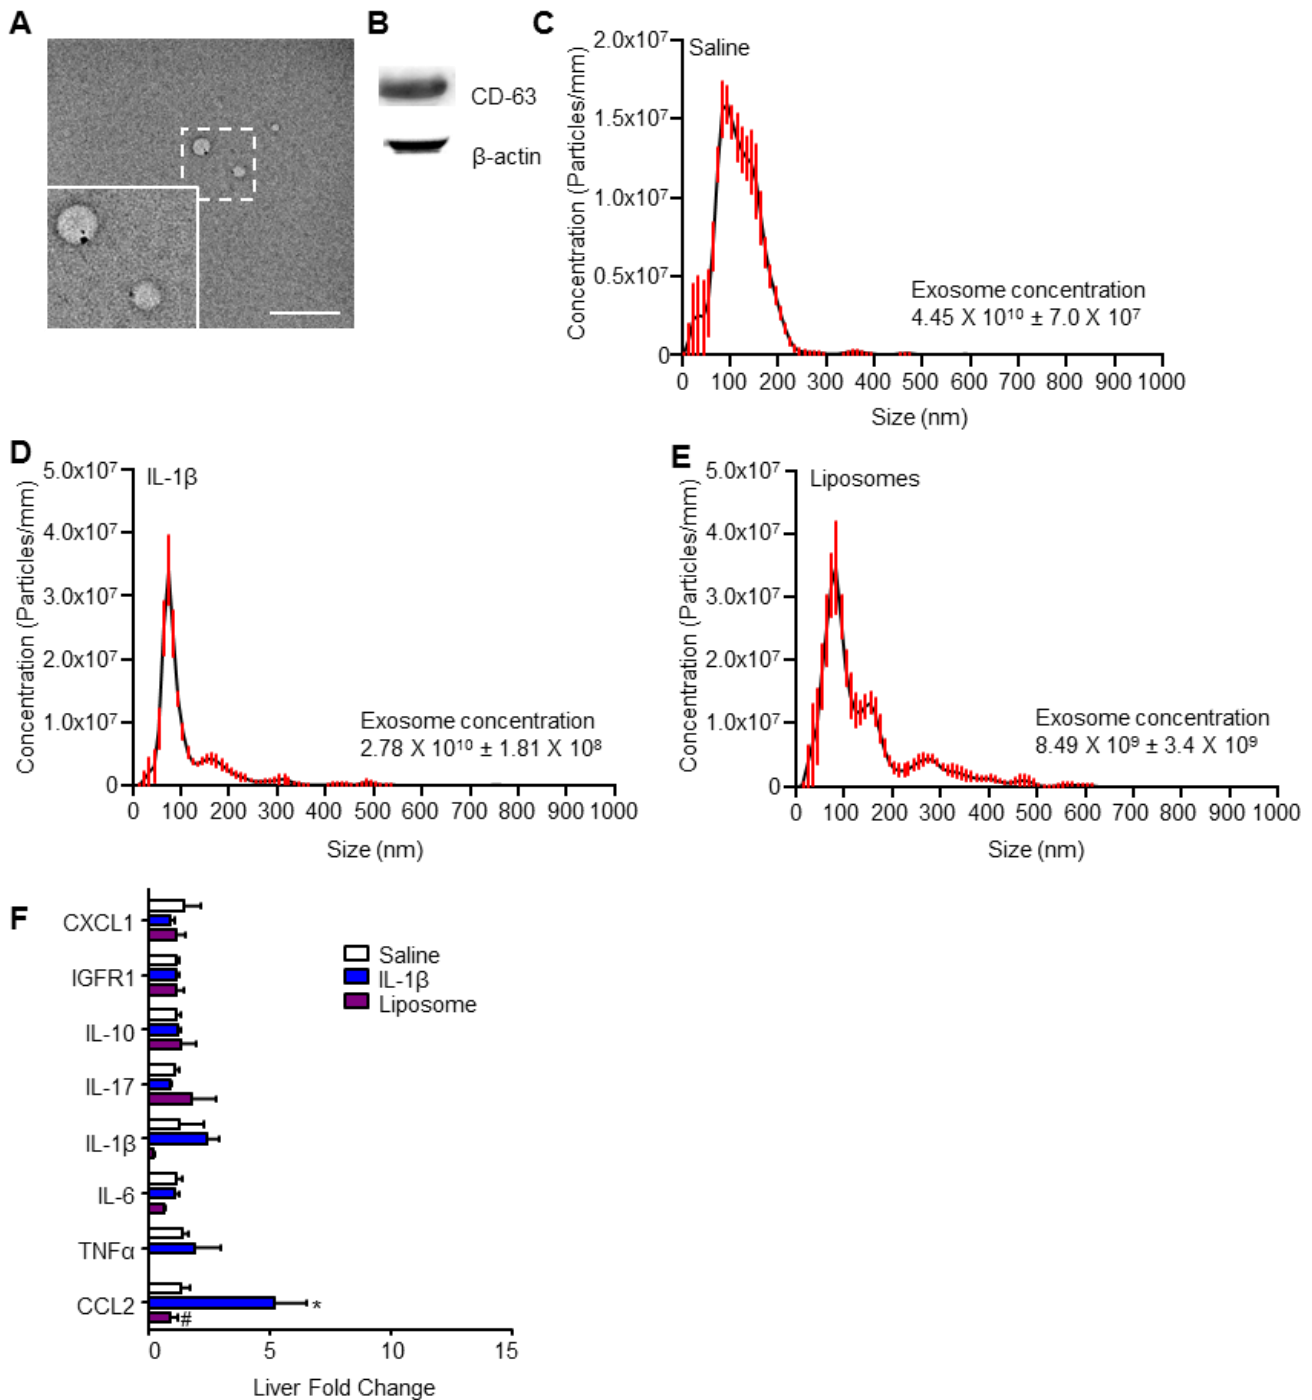

**Fig. S3. EV isolation, quantitation, and liver cytokine response 24 hours after EV infusion in mice.** (A) Representative electron micrograph of EV isolated from plasma. Scale bar = 100  $\mu$ m. (B) Western blot showing that EV were immunopositive for the tetraspan protein marker of EV CD63. (C-E) Nanoparticle tracking showing size and concentration of EV isolated from serum 2 hours after striatal injection of (C) saline (D) IL-1 $\beta$  or (E) protein and RNA depleted EV (liposomes). (F) Liver cytokine expression 24 hours after tail vein infusion of  $3.0 \times 10^9$  EV or liposomes into recipient animals co-injected in striatum with IL-1 $\beta$  (0.1 ng in 3  $\mu$ l) + altenusin (50  $\mu$ M). Data are mean  $\pm$  SEM, n = 4-10 mice per condition. \*  $p < 0.05$  compared to control, and #  $p < 0.05$  compared to IL-1 $\beta$ .

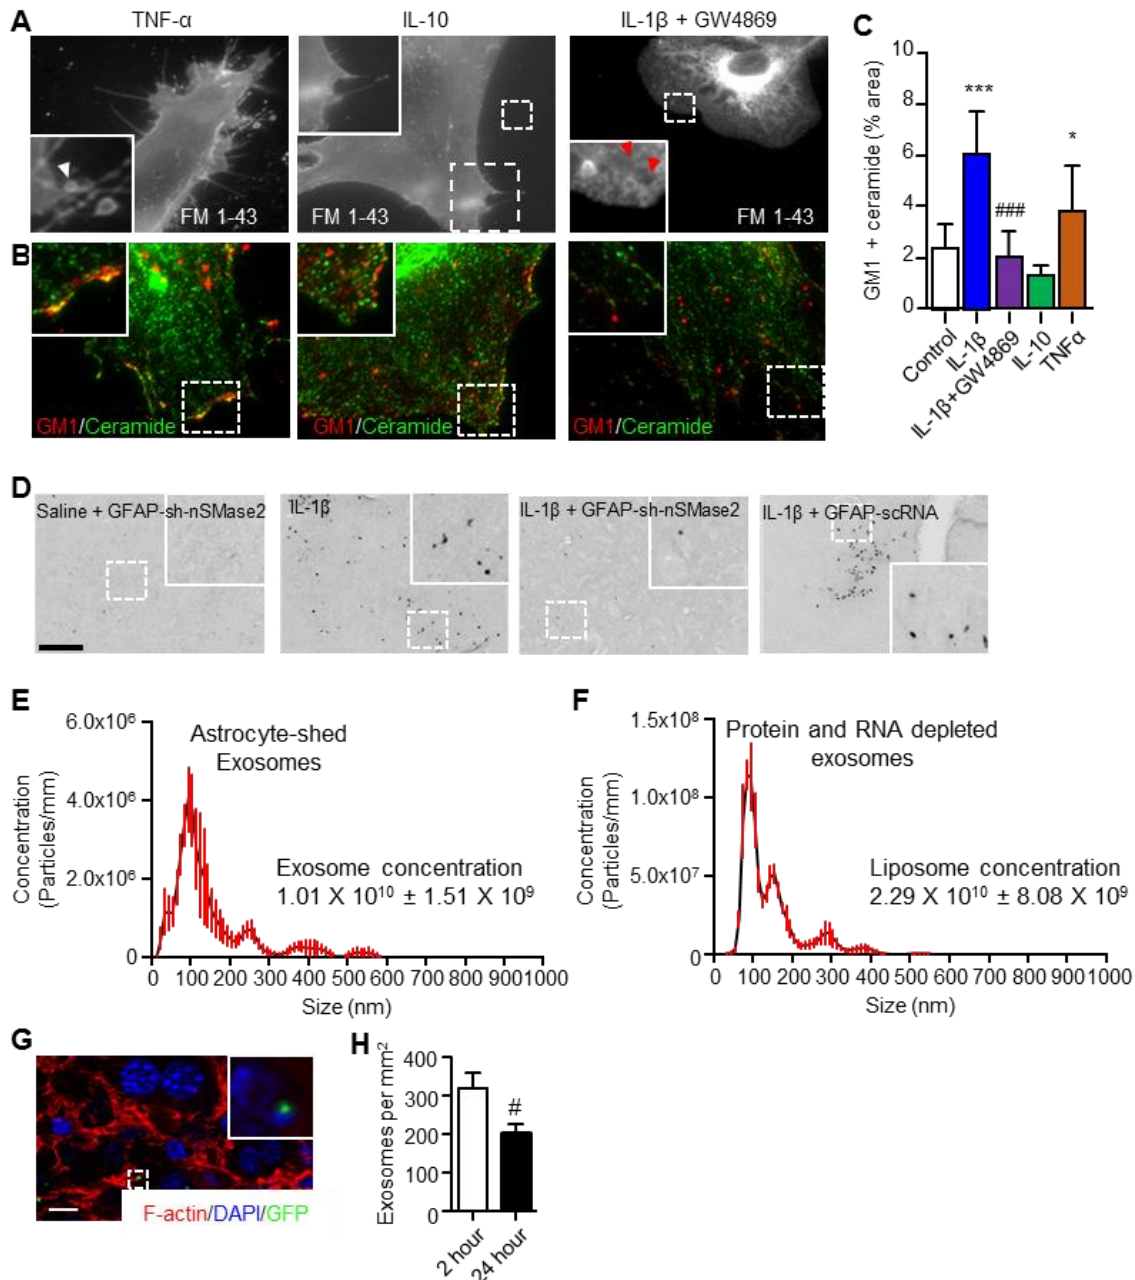

**Fig. S4. IL-1 $\beta$  and TNF $\alpha$  promote formation of ceramide-rich membrane microdomains and EV release from astrocytes.** (A) Representative fluorescence images from FM1-43 labeled astrocytes showing that TNF $\alpha$  (100 ng/ml), but not IL-10 (100 ng/ml) stimulated a rapid (within 2 min) release of EV (white arrows). Inhibition of nSMase with GW4869 (20  $\mu$ M) blocked IL-1 $\beta$  stimulated release of EV, but did not prevent the formation of multivesicular bodies (red arrows). (B) Representative immunofluorescent images and (C) quantitation of plasma membrane dual positive for GM1/ceramide. IL-1 $\beta$  induced a rapid formation of CTX555 (labels the ganglioside GM1; red), and ceramide (green) dual positive plasma membrane microdomains. Microdomain formation was blocked by pre-treatment with GW4869. A similar result was obtained with TNF $\alpha$  that is also known to be associated with the nSMase2-mediated formation of ceramide, but not the anti-inflammatory cytokine IL10 that is not linked to nSMase2. (D) Representative photomicrographs of Ly6b<sup>+</sup> leukocytes in striatum 24 hours after administration of saline, IL-1 $\beta$ , IL-1 $\beta$  + GFAP-sh-nSMase2 ( $5 \times 10^9$  particles in 0.5  $\mu$ l), IL-1 $\beta$  + scRNA (scrambled sequence;  $5 \times 10^9$  particles in 0.5  $\mu$ l). (E and F) Nanoparticle tracking analysis showing size, distribution, and concentration (inset) of EV isolated from GFAP-GFP astrocytes in response to IL-1 $\beta$  (100 ng/ml stimulation) (E), and protein + RNA depleted EV (F). (G) Merged image (2 hours) and (H) stereological quantitation (2 hours, 24 hours) in liver following tail vein infusion of  $3.0 \times 10^9$  GFP+ EV. F-actin labeled cells (red), DAPI labeled nuclei (blue), and GFP+ EV (green). Insets are magnifications of the indicated regions. Scale bar = 250  $\mu$ m. Data are mean  $\pm$  S.D, n = 10 experiments for tissue culture, and n = 3 mice per condition. \* =  $p < 0.05$ , \*\*\*  $p < 0.001$  compared to control, # =  $p < 0.05$ , ### =  $p < 0.001$  compared to IL-1 $\beta$ . ANOVA with Tukey post-hoc comparisons.



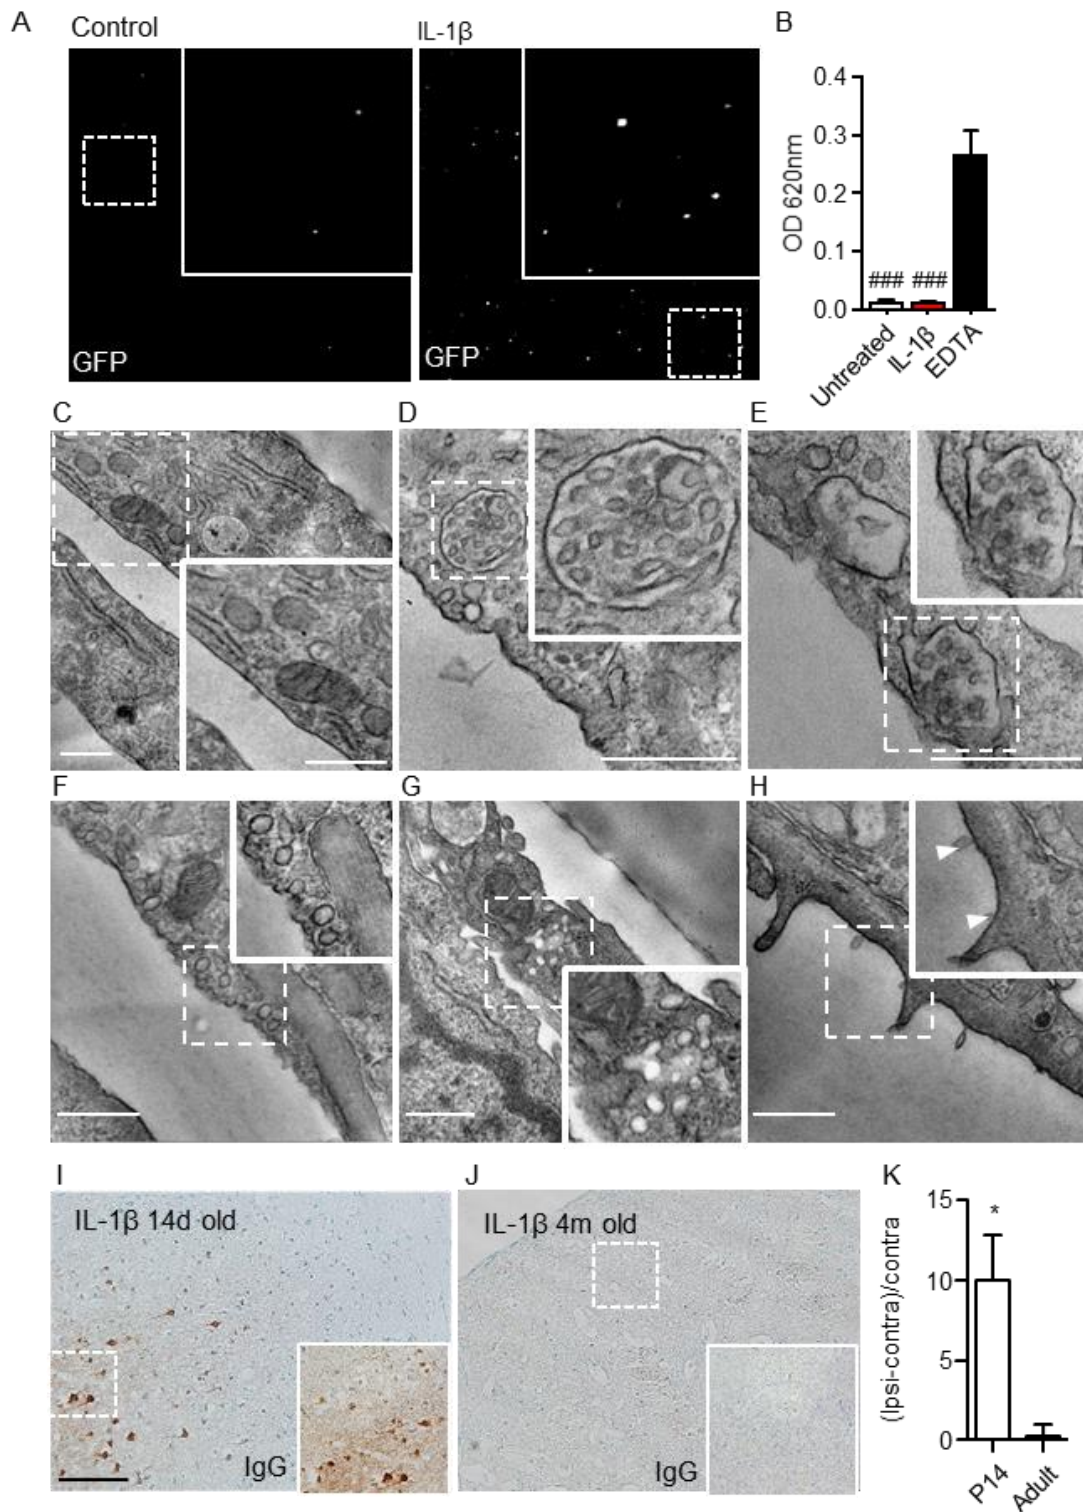

**Fig. S5. EVs rapidly transverse endothelial cells in a BBB model system.** (A) Representative images of GFP+ EV collected from the luminal side of the BBB culture following stimulation of the astrocyte side of the bilayer with vehicle (Control) or IL-1 $\beta$  (100 ng/ml). Insets show magnifications of the indicated regions. IL-1beta treatment did not cause BBB permeability as assayed by (B) passage of Evan's blue dye coupled BSA. Representative electron micrographs from BBB cultures showing (C) an astrocyte under control conditions, (D) multivesicular bodies are apparent astrocytes within 15 min following stimulation with IL-1 $\beta$  (100 ng/ml), that (E) fuse with the plasma membrane, (F) are taken up by endothelium, (G) transverse the cytoplasm, and (H) are released site on the luminal side of the endothelium (white arrows show EV in the process of being released) Inserts show magnification of the indicated region. Representative images show IgG immunostaining in striatum from (I) 14 day old, and (J) 4 month old mice injected in striatum with IL-1 $\beta$  (0.1 ng in 3  $\mu$ l) and (K) quantitative results. Scale bar = 100 nm. Data are mean  $\pm$  SEM, n = 3 mice or measurement per condition. \* =  $p < 0.05$  compared to adult mice, ### =  $p < 0.001$  compared to EDTA. ANOVA with Tukey post-hoc comparisons.

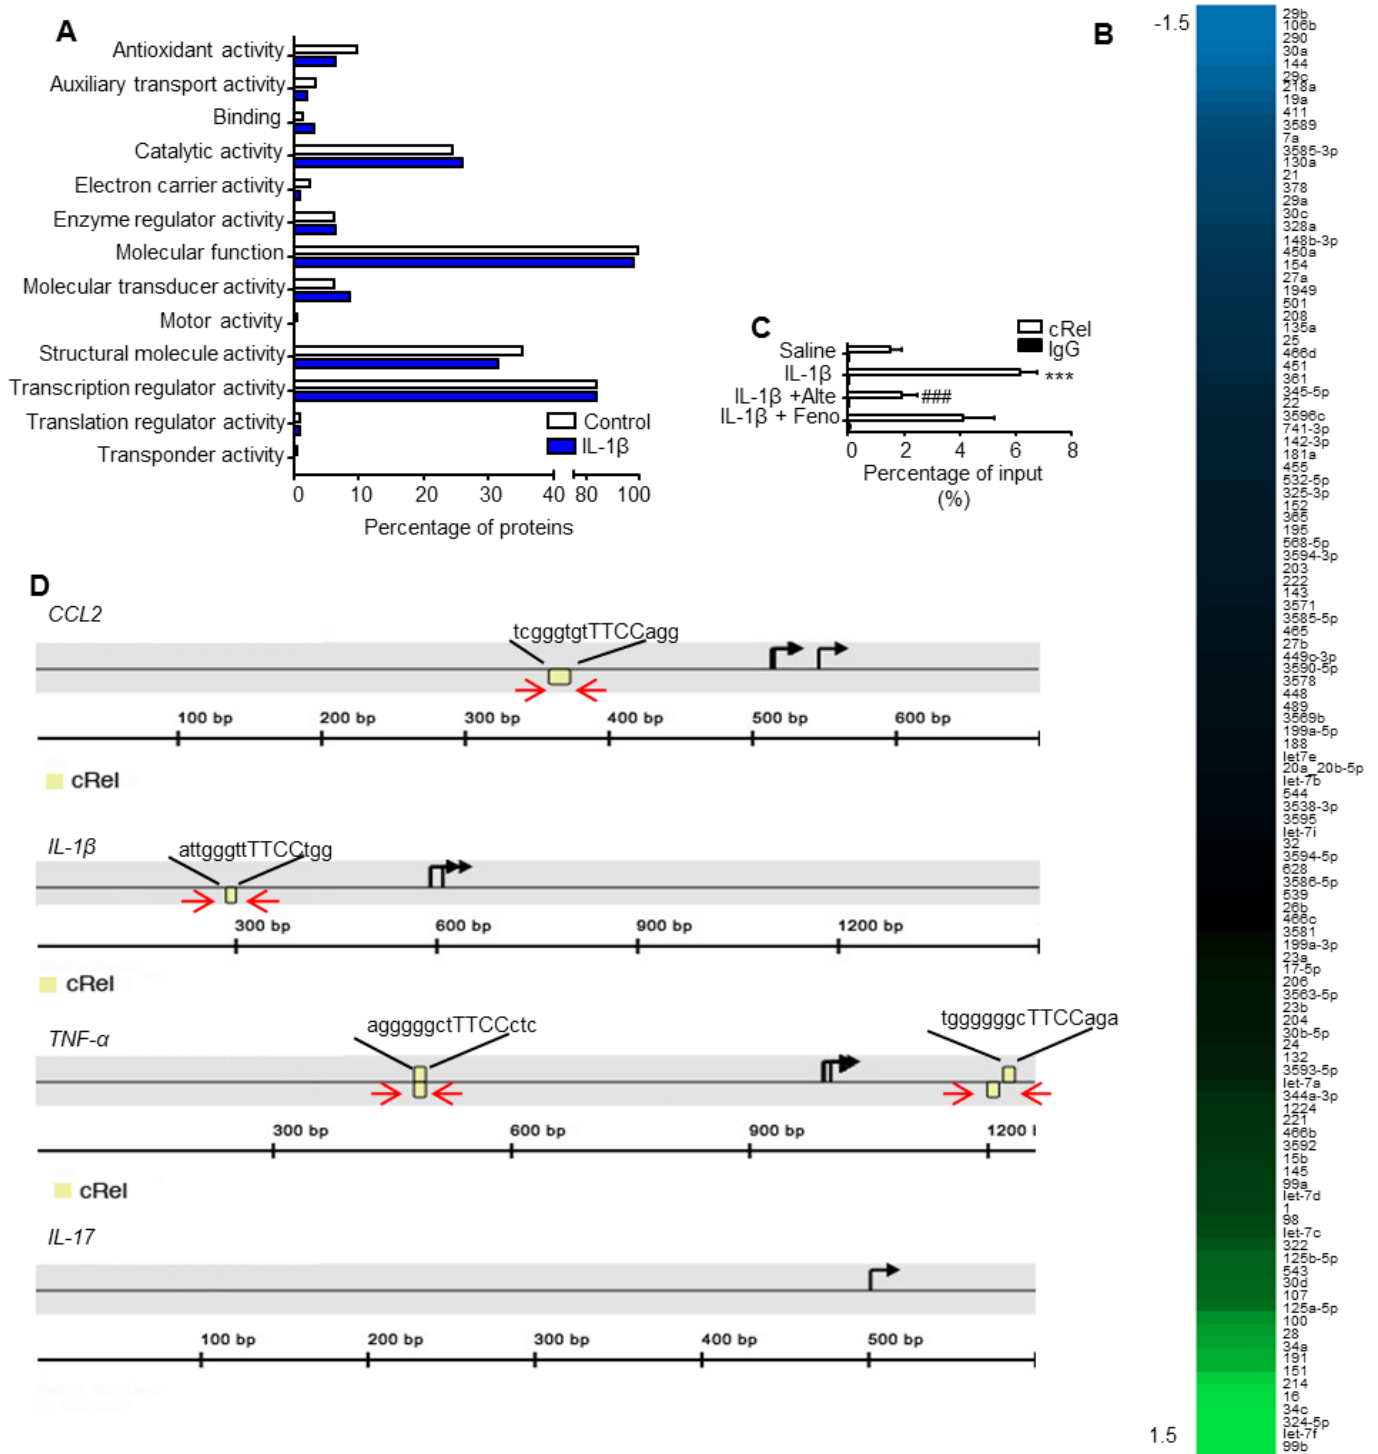

**Fig. S6. Additional proteomic and ChIP results.** (A) Proteins detected in EV were largely related to molecular function, catalytic activity and binding. (B) Heat map of quantile normalized data from NanoString hybridization assay. We detected 124 miRNAs two standard deviations or more above background measures defined by six negative controls. Green color indicates upregulated miRNAs, and blue indicates downregulated miRNAs compared with control (log<sub>2</sub> scale). (C) ChIP assays results showing increased NF-κB binding to a second promoter region of TNF-α in liver following striatal injection of IL-1β (1 ng in 3 μl) compared to the saline. Co-administration of IL-1β + altenusin (50 μM) prevented NF-κB binding to this promoter region. (D) Pictorial representations of the binding regions used in the ChIP assay. Data are mean ± SEM, n = 3 mice per condition. \*\*\*  $p < 0.001$  compared to control, ### =  $p < 0.001$  compared to IL-1β. ANOVA with Tukey post-hoc comparisons.



**Table S1. List of all proteins identified in exosomes collected from control GFAP-GFP astrocytes.** The table is provided as an Excel file in the auxiliary materials online.

**Table S2. List of all proteins identified in exosomes collected from IL-1 $\beta$ -stimulated GFAP-GFP astrocytes.** The table is provided as an Excel file in the auxiliary materials online.

**Table S3. List of miRNA identified in exosomes and relative fold change.** The miRNA content of extracellular vesicles released cultured astrocytes upon stimulation with IL-1 $\beta$  or released over a 24 hour period was measured using a NanoString multiplex system. The fold change was then calculated by dividing the normalised miRNA counts from the IL-1 $\beta$  EVs by the normalised counts from the control EVs.

| miRNA identity  | Accession number | IL-1 $\beta$ /ctl ratio |
|-----------------|------------------|-------------------------|
| rno-let-7a      | MIMAT0000774     | 0.241345887             |
| rno-let-7b      | MIMAT0000775     | -0.104969975            |
| rno-let-7c      | MIMAT0000776     | 0.485001547             |
| rno-let-7d      | MIMAT0000562     | 0.351745631             |
| rno-let-7e      | MIMAT0000777     | -0.11668322             |
| rno-let-7f      | MIMAT0000778     | 3.186973671             |
| rno-let-7i      | MIMAT0000779     | -0.032254872            |
| rno-miR-1       | MIMAT0003125     | 0.393657805             |
| rno-miR-100     | MIMAT0000822     | 1.051643749             |
| rno-miR-106b    | MIMAT0000825     | -0.661234696            |
| rno-miR-107     | MIMAT0000826     | 0.668524345             |
| rno-miR-1224    | MIMAT0012827     | 0.270175787             |
| rno-miR-125a-5p | MIMAT0000829     | 0.938402599             |
| rno-miR-125b-5p | MIMAT0000830     | 0.584757329             |
| rno-miR-126     | MIMAT0000832     | -0.062153451            |
| rno-miR-130a    | MIMAT0000836     | -0.471077818            |
| rno-miR-132     | MIMAT0000838     | 0.151302286             |
| rno-miR-135a    | MIMAT0000841     | -0.342751409            |
| rno-miR-142-3p  | MIMAT0000848     | -0.252981614            |
| rno-miR-143     | MIMAT0000849     | -0.196021933            |
| rno-miR-144     | MIMAT0000850     | -0.622644233            |
| rno-miR-145     | MIMAT0000851     | 0.346288928             |
| rno-miR-148b-3p | MIMAT0000579     | -0.398725668            |
| rno-miR-151     | MIMAT0000613     | 1.596999376             |
| rno-miR-152     | MIMAT0000854     | -0.214297227            |
| rno-miR-154     | MIMAT0000856     | -0.385053867            |
| rno-miR-15b     | MIMAT0000784     | 0.321288628             |
| rno-miR-16      | MIMAT0000785     | 1.764426981             |
| rno-miR-17-5p   | MIMAT0000786     | 0.121077642             |
| rno-miR-181a    | MIMAT0000858     | -0.247270899            |
| rno-miR-188     | MIMAT0005301     | -0.11951032             |
| rno-miR-190b    | MIMAT0005302     | -0.967210493            |
| rno-miR-191     | MIMAT0000866     | 1.259744602             |
| rno-miR-1949    | MIMAT0017852     | -0.368446812            |
| rno-miR-195     | MIMAT0000870     | -0.206075705            |
| rno-miR-199a-3p | MIMAT0004738     | 0.095284716             |
| rno-miR-199a-5p | MIMAT0000872     | -0.123404364            |
| rno-miR-19a     | MIMAT0000789     | -0.567524871            |

| miRNA identity             | Accession number | IL-1 $\beta$ /ctl ratio |
|----------------------------|------------------|-------------------------|
| rno-miR-203                | MIMAT0000876     | -0.201029178            |
| rno-miR-204                | MIMAT0000877     | 0.130302957             |
| rno-miR-206                | MIMAT0000879     | 0.121388133             |
| rno-miR-208.017            | MIMAT0000880     | -0.351104424            |
| rno-miR-20a+rno-miR-20b-5p | MIMAT0000602     | -0.109971728            |
| rno-miR-21                 | MIMAT0000790     | -0.464284125            |
| rno-miR-214                | MIMAT0000885     | 1.762106811             |
| rno-miR-218a               | MIMAT0000888     | -0.598528223            |
| rno-miR-22                 | MIMAT0000791     | -0.274139644            |
| rno-miR-221                | MIMAT0000890     | 0.280706397             |
| rno-miR-222                | MIMAT0000891     | -0.201029178            |
| rno-miR-23a                | MIMAT0000792     | 0.102005439             |
| rno-miR-23b                | MIMAT0000793     | 0.128391443             |
| rno-miR-24                 | MIMAT0000794     | 0.14643189              |
| rno-miR-25                 | MIMAT0000795     | -0.331260552            |
| rno-miR-26b                | MIMAT0000797     | 0.006233158             |
| rno-miR-27a                | MIMAT0000799     | -0.379693253            |
| rno-miR-27b                | MIMAT0000798     | -0.159528393            |
| rno-miR-28                 | MIMAT0000800     | 1.131952445             |
| rno-miR-290.028            | MIMAT0000893     | -0.654170672            |
| rno-miR-293                | MIMAT0012847     | -0.968854452            |
| rno-miR-29a                | MIMAT0000802     | -0.450265874            |
| rno-miR-29b                | MIMAT0000801     | -0.681164638            |
| rno-miR-29c                | MIMAT0000803     | -0.599276754            |
| rno-miR-301a               | MIMAT0000552     | -0.080720933            |
| rno-miR-30a                | MIMAT0000808     | -0.637919462            |
| rno-miR-30b-5p             | MIMAT0000806     | 0.144706947             |
| rno-miR-30c                | MIMAT0000804     | -0.449857491            |
| rno-miR-30d                | MIMAT0000807     | 0.616652495             |
| rno-miR-32                 | MIMAT0000811     | -0.0212707              |
| rno-miR-322                | MIMAT0001619     | 0.576101993             |
| rno-miR-324-5p             | MIMAT0000553     | 2.478249832             |
| rno-miR-325-3p             | MIMAT0004639     | -0.239408304            |
| rno-miR-328a               | MIMAT0000564     | -0.434663384            |
| rno-miR-335                | MIMAT0000575     | -0.962989709            |
| rno-miR-344a-3p            | MIMAT0000592     | 0.269079204             |
| rno-miR-345-5p             | MIMAT0000594     | -0.301188957            |
| rno-miR-34a                | MIMAT0000815     | 1.234647452             |
| rno-miR-34c                | MIMAT0000814     | 2.474663256             |
| rno-miR-3563-5p            | MIMAT0017833     | 0.121788183             |
| rno-miR-3571               | MIMAT0017851     | -0.18686897             |
| rno-miR-3578               | MIMAT0017866     | -0.138915464            |
| rno-miR-3581               | MIMAT0017870     | 0.07029518              |
| rno-miR-3583-3p            | MIMAT0017874     | -0.082914689            |
| rno-miR-3585-3p            | MIMAT0017879     | -0.479606403            |
| rno-miR-3585-5p            | MIMAT0017878     | -0.183745092            |
| rno-miR-3586-5p            | MIMAT0017880     | -0.008821139            |
| rno-miR-3589               | MIMAT0003379     | -0.515453797            |
| rno-miR-3590-3p            | MIMAT0017890     | -0.048680908            |
| rno-miR-3590-5p            | MIMAT0017889     | -0.151199488            |

| miRNA identity   | Accession number | IL-1 $\beta$ /ctl ratio |
|------------------|------------------|-------------------------|
| rno-miR-3592     | MIMAT0017895     | 0.314053506             |
| rno-miR-3593-5p  | MIMAT0017896     | 0.194009308             |
| rno-miR-3594-3p  | MIMAT0017899     | -0.201666761            |
| rno-miR-3594-5p  | MIMAT0017898     | -0.021090167            |
| rno-miR-3595     | MIMAT0017903     | -0.042135419            |
| rno-miR-3596b    | MIMAT0017871     | -0.124293553            |
| rno-miR-3596c    | MIMAT0017877     | -0.272721368            |
| rno-miR-361      | MIMAT0003117     | -0.325117714            |
| rno-miR-365      | MIMAT0001549     | -0.211966209            |
| rno-miR-378      | MIMAT0017888     | -0.457356575            |
| rno-miR-411      | MIMAT0005312     | -0.540763615            |
| rno-miR-421      | MIMAT0001320     | -0.057591482            |
| rno-miR-448      | MIMAT0001534     | -0.132958072            |
| rno-miR-449c-3p  | MIMAT0017804     | -0.153123849            |
| rno-miR-450a     | MIMAT0001547     | -0.394606342            |
| rno-miR-451      | MIMAT0001633     | -0.325318319            |
| rno-miR-455      | MIMAT0005316     | -0.245761095            |
| rno-miR-465      | MIMAT0012850     | -0.165802324            |
| rno-miR-466b     | MIMAT0005278     | 0.286337471             |
| rno-miR-466c.039 | MIMAT0005279     | 0.065758376             |
| rno-miR-466d     | MIMAT0017824     | -0.328821749            |
| rno-miR-489      | MIMAT0003113     | -0.125760338            |
| rno-miR-501      | MIMAT0003116     | -0.361549945            |
| rno-miR-511      | MIMAT0012829     | -0.973206117            |
| rno-miR-532-5p   | MIMAT0005322     | -0.243744568            |
| rno-miR-539      | MIMAT0003176     | 0.000696856             |
| rno-miR-540      | MIMAT0003174     | -0.966940816            |
| rno-miR-543      | MIMAT0004787     | 0.609186114             |
| rno-miR-544      | MIMAT0012831     | -0.100741533            |
| rno-miR-598-5p   | MIMAT0005324     | -0.206050432            |
| rno-miR-628      | MIMAT0012836     | -0.011845546            |
| rno-miR-741-3p   | MIMAT0017902     | -0.254790984            |
| rno-miR-7a       | MIMAT0000606     | -0.493066671            |
| rno-miR-98       | MIMAT0000819     | 0.420910671             |
| rno-miR-99a      | MIMAT0000820     | 0.350049953             |
| rno-miR-99b      | MIMAT0000821     | 5.504037671             |

**Table S4. List of ChIP primers.** The sequences of each primer used for ChIP analysis in this study is listed. F, forward; R, reverse.

| Primer   | Sequence                          |
|----------|-----------------------------------|
| mCcl2_F  | 5- TTC CAC TTC CTG GAA ACA CC -3  |
| mCcl2_R  | 5- TCA CCC TGG ATA AGT GAT GG -3  |
| mIl1_F   | 5- ACT TCT GGG TGT GCA TCT ACG -3 |
| mIl1_R   | 5- GGA CAA TTG TGC AGA TGG TG -3  |
| mIl10_F  | 5- GGG TTT CCT TTG GGT AAC TG -3  |
| mIl10_R  | 5- TGT TTC CTC CAC TCA ACC TG -3  |
| mIl17_F  | 5- CTC TTC ATC CAC CTC ACA CG -3  |
| mIl17_R  | 5- TCT CCC TGG ACT CAT GTT TG -3  |
| mTNFa_F  | 5- AAC TCA AAC AGG GGG CTT TC -3  |
| mTNFa_R  | 5- CAT CCA TGG GGG AGA ACT TAG -3 |
| mTNFa_F4 | 5- ACA CCA TGA GCA CAG AAA GC -3  |
| mTNFa_R4 | 5- CGC CTG GAG TTC TGG AAG -3     |

**Movie S1. Visualization of IL-1 $\beta$ -induced release of EVs from cultured primary astrocytes.** The shedding of EVs from primary astrocyte cultures was visualized with styryl pyridinium dye FM1-43. The movie is provided in the auxiliary materials online.
